# Supplementary material
Source: PubMed Central journal article supplement (PMC6957267)

**Supplementary Figure 1.** The amino acid sequences of m610.27 (A) and m630.3 (B) in alignment with their corresponding germlines of human antibody V genes and/or wild types. The complementarity-determining regions (CDRs) and framework regions (FRs) are indicated according to the ImMunoGeneTics annotation (<http://imgt.cines.fr/>). The somatic mutations in the V regions of the antibodies and the mutations induced by random mutagenesis are highlighted with gray background.

**Supplementary Figure 2.** Schematic representation of antibody structures and SDS-PAGE analysis. (A) Fab m610.27 was converted to a standard IgG1 format. (B) m630.3Fc was constructed by joining eAd m630.3 to the N terminus of human IgG1 Fc through a hinge linker. (C) The bispecific antibody, m660, was generated by fusing scFv m610.27 and eAd m630.3 to the N termini of the heavy and light chain constant regions of a human IgG1, respectively, via a linker composed of three repeats of the G<sub>4</sub>S motif. (D) Reducing and nonreducing SDS-PAGE of the antibodies purified from 293 free style cell cultures.

# Supplementary Figure 1

(A)

|             | FR1       | CDR1        | FR2   | CDR2 | FR3  | CDR3       | FR4    |      |      |         |             |        |       |          |               |             |
|-------------|-----------|-------------|-------|------|------|------------|--------|------|------|---------|-------------|--------|-------|----------|---------------|-------------|
|             | 1         | 10          | 20    | 30   | 40   | 50         | 60     | 70   | 80   | 90      | 100         |        |       |          |               |             |
| m610 VH     | QVQLVQSGA | EVKKPGASVKV | SCKAS | GYTF | TSYY | MHWVRQAPGQ | GLEWMI | INPS | GGST | SYAQKFQ | GRVTMTRDTST | STVYME | LSRLS | DDTAVYYC | ARDVQWLAYGMDV | WGQGTTVTVSS |
| IGHV1-46*01 | QVQLVQSGA | EVKKPGASVKV | SCKAS | GYTF | TSYY | MHWVRQAPGQ | GLEWMI | INPS | GGST | SYAQKFQ | GRVTMTRDTST | STVYME | LSRLS | EDTAVYYC | AR            |             |

|             | FR1       | CDR1     | FR2       | CDR2 | FR3 | CDR3       | FR4      |    |    |         |         |             |             |           |            |
|-------------|-----------|----------|-----------|------|-----|------------|----------|----|----|---------|---------|-------------|-------------|-----------|------------|
|             | 1         | 10       | 20        | 30   | 40  | 50         | 60       | 70 | 80 | 90      | 100     |             |             |           |            |
| m610 VL     | DIQMTQSPS | PLSASVGD | RVTITCRAS | QSI  | SSY | LNWYQQKPGK | KAPKLLIY | AA | SS | SLQSGVP | SRFSGSG | SGTDFTLTISS | LQPEDFATYYC | QSYSTPLTF | GGGTKVEIKR |
| IGKV1-39*01 | DIQMTQSPS | PLSASVGD | RVTITCRAS | QSI  | SSY | LNWYQQKPGK | KAPKLLIY | AA | SS | SLQSGVP | SRFSGSG | SGTDFTLTISS | LQPEDFATYYC | QSYSTP    |            |

|            | FR1       | CDR1     | FR2       | CDR2 | FR3 | CDR3       | FR4      |    |    |         |         |             |             |           |            |
|------------|-----------|----------|-----------|------|-----|------------|----------|----|----|---------|---------|-------------|-------------|-----------|------------|
|            | 1         | 10       | 20        | 30   | 40  | 50         | 60       | 70 | 80 | 90      | 100     |             |             |           |            |
| m610 VL    | DIQMTQSPS | PLSASVGD | RVTITCRAS | QSI  | SSY | LNWYQQKPGK | KAPKLLIY | AA | SS | SLQSGVP | SRFSGSG | SGTDFTLTISS | LQPEDFATYYC | QSYSTPLTF | GGGTKVEIKR |
| m610.27 VL | DIQMTQSPS | PLSASVGD | RVTITCRAS | QSI  | SSY | LNWYQQKPGK | RAPDLLIN | AA | SS | SLQSGVP | SRFSGSG | SGTDFTLTISS | LQPEDFATYYC | QSYSLPTF  | GGGTKVEIKG |

(B)

|        | FR1       | CDR1      | FR2      | CDR2 | FR3  | CDR3       | FR4     |      |      |         |           |          |                |            |             |             |
|--------|-----------|-----------|----------|------|------|------------|---------|------|------|---------|-----------|----------|----------------|------------|-------------|-------------|
|        | 1         | 10        | 20       | 30   | 40   | 50         | 60      | 70   | 80   | 90      | 100       |          |                |            |             |             |
| m630   | QVQLVQSGG | GLVQPGGSL | RRLSCAAS | SFDF | DYYE | MSWVRQAPGQ | RLEWVAY | ISKS | GGTK | MYADSVK | GRFTISRDN | SKNTLYLQ | MNTLRAEDTAMYYC | AKDRATCSGG | SCYSFYFGMDV | WGQGTLVTVSS |
| m630.1 | QVQLVQSGG | GLVQPGGSL | RRLSCAAS | SFDF | DYYE | MSWVRQAPGQ | RLEWVAY | ISKS | GGTK | MYADSVK | GRFTISRDN | SKNTLYLQ | MNTLRAEDTAMYYC | AKDRATCRGG | SCYSFYFGMDV | WGQGTLVTVSS |
| m630.3 | QVQLVQSGG | GLVQPGGSL | RRLSCAAS | SFDF | DYYE | MSWVRQAPGQ | RLEWVAY | ISKS | GGTK | MYADSVK | GRFTISRDN | SKNTLYLQ | MNTLRAEDTAMYYC | AKDRATCRGG | SCYSFYFGMDV | WGQGTLVTVSS |
| m630.4 | QVQLVQSGG | GLVQPGGSL | RRLSCAAS | SFDF | DYYE | MSWVRQAPGQ | RLEWVAY | ISKS | GGTK | MYADSVK | GRFTISRDN | SKNTLYLQ | MNTLRAEDTAMYYC | AKDRATCSGG | SCYSFYFGMDV | WGQGTLVTVSS |
| m630.9 | QVQLVQSGG | GLVQPGGSL | RRLSCAAS | SFDF | DYYE | MSWVRQAPGQ | RLEWVAY | ISKS | GGTK | MYADSVK | GRFTISRDN | SKNTLYLQ | MNTLRAEDTAMYYC | AKDRATCSGG | SCYSFYFGMDV | WGQGTLVTVSS |

# Supplementary Figure 2

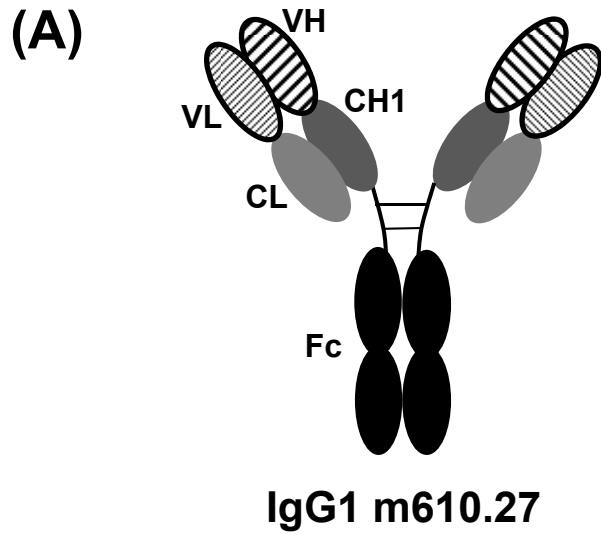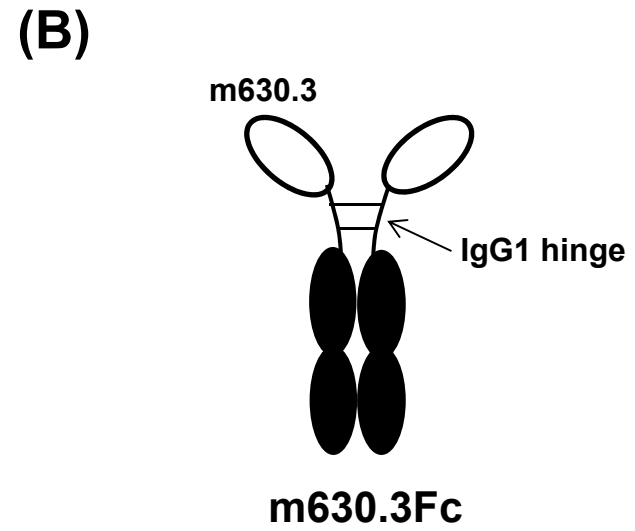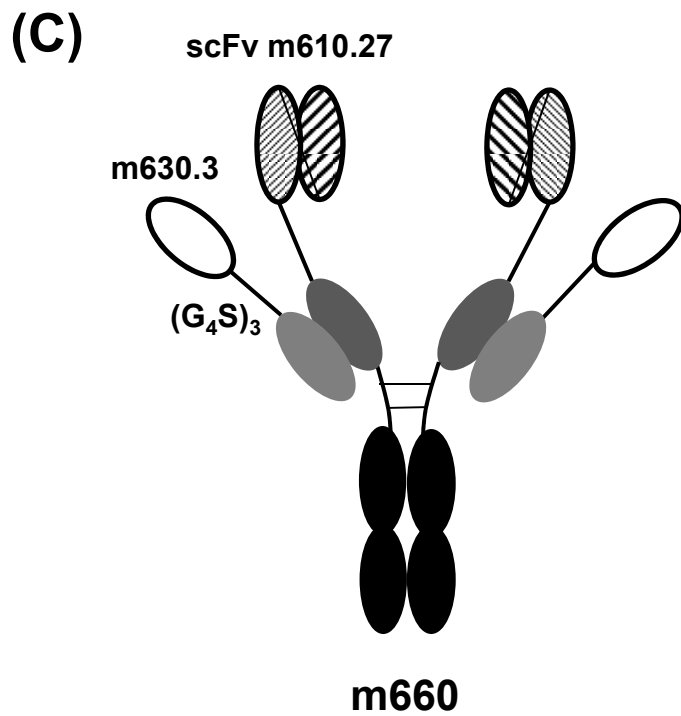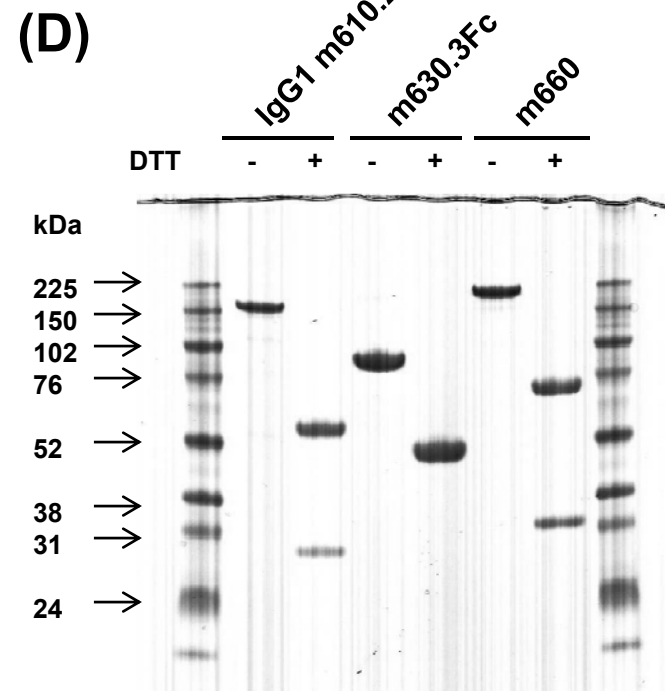

Supplement: NIHMS1065953-supplement-1.pdf [file NIHMS1065953-supplement-1.pdf]
